# Supplementary material
Source: PubMed Central journal article supplement (PMC2346754)
Supplement: jvirol_82_10_4974__1.pdf [file jvirol_82_10_4974__1.pdf]

1 **Supplementary movies S1-S3:**

2 Time-lapse confocal laser scanning microscopy (CLSM) of rHSV-RYC - and rHSV-RY-  
3 infected cells. Vero cells were infected with rHSV-RYC (**S1** and **S2**) or rHSV-RY (**S3**) at  
4 MOIs of 2 and 0.3 PFU, respectively. Cells that just started to accumulate fluorescent proteins  
5 were monitored by CLSM with settings specific for ECFP (VP16-ECFP), EYFP (EYFP-gH),  
6 and mRFP (mRFP-VP26). Images were processed with Imaris software (Bitplane, Zurich,  
7 Switzerland).
